# Supplementary material for: A mannose-conjugated multi-layered polymeric nanocarrier system for controlled and targeted release on alveolar macrophages
Source: Royal Society of Chemistry journal article supplement (doi:10.1039/c7py02000g), 2017-12-04
Supplement: c7py02000g1.pdf [file c7py02000g1.pdf]

## Supporting Information

### **Mannose conjugated multi-layered polymeric nano carrier system for controlled and targeted release on alveolar macrophages**

Rajendran Amarnath Praphakar<sup>a</sup>, H. Shakila<sup>b</sup>, Vijayan N. Azger Dusthacker<sup>c</sup>, Murugan A. Munusamy<sup>d</sup>, Suresh Kumar<sup>e</sup>, Mariappan Rajan<sup>\*a</sup>

<sup>a</sup>Biomaterials in Medicinal Chemistry Laboratory, Department of Natural Products Chemistry, School of Chemistry, Madurai Kamaraj University, Madurai-625021, Tamil Nadu, India.

<sup>b</sup>Department of Molecular Microbiology, School of Biotechnology, Madurai Kamaraj University, Madurai-625021, Tamil Nadu, India

<sup>c</sup>Department of Bacteriology, National Institute for Research in Tuberculosis, Chennai, Tamil Nadu, India

<sup>d</sup>Department of Botany and Microbiology, King Saud University, Riyadh, 11451, Saudi Arabia

<sup>e</sup>Department of Medical Microbiology and Parasitology, Universiti Putra Malaysia, 43400 Serdang, Selangor, Malaysia

\*Tel.: +91 9488014084; Fax: 0452-2459845; Email: rajanm153@gmail.com (M. Rajan)

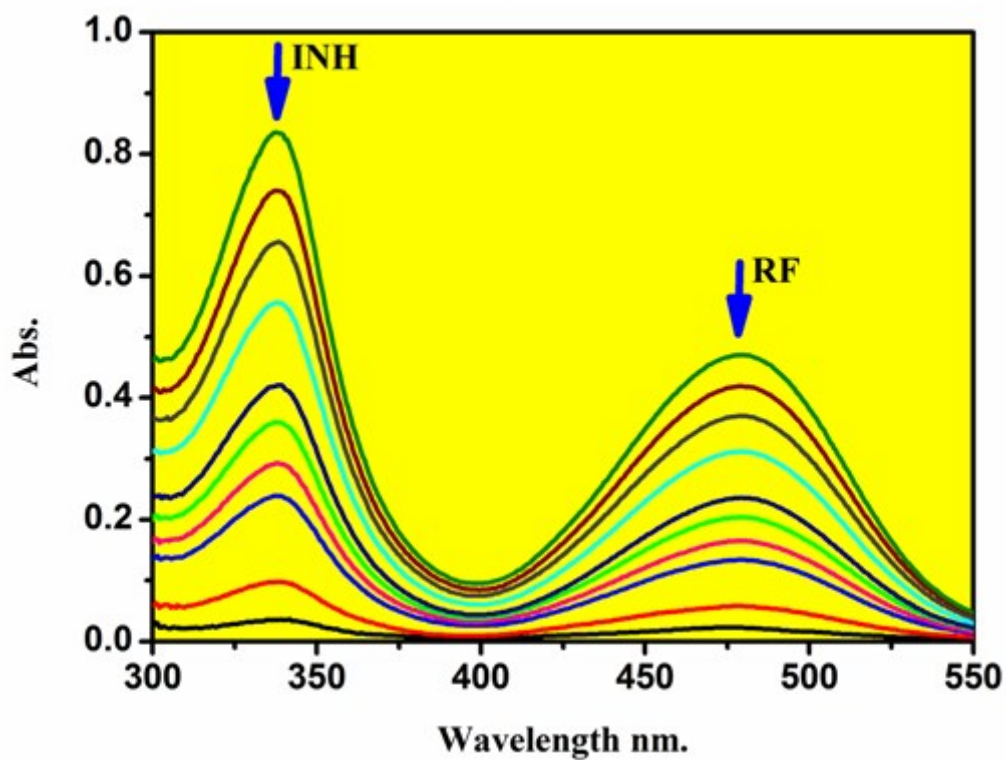

S. Figure. 1. Encapsulation efficiency of INH loaded SA-g-AA-RF/CS-g-AA-M

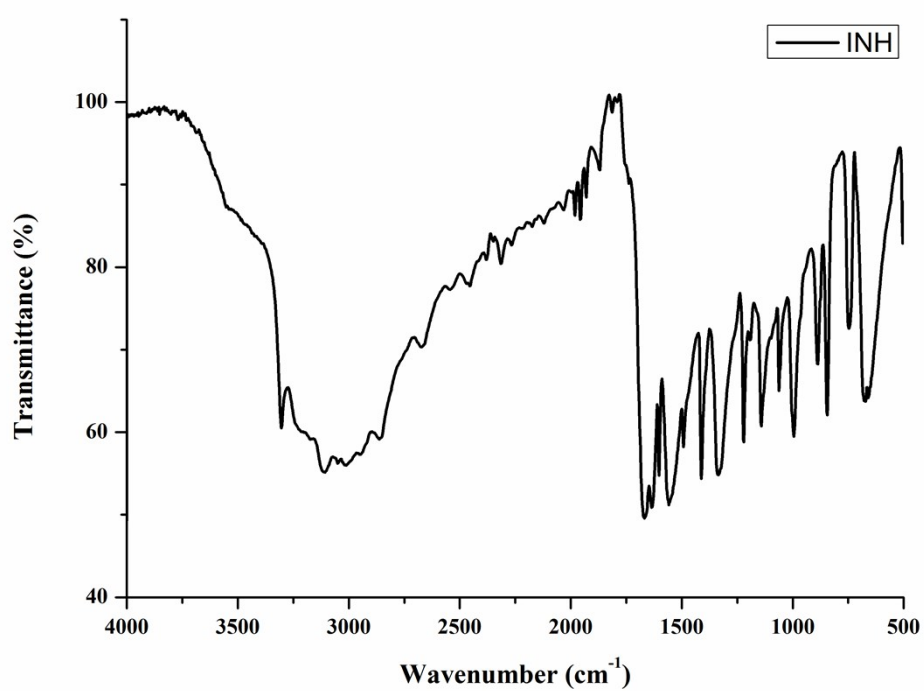

S. Figure. 2. FT-IR spectrum of INH

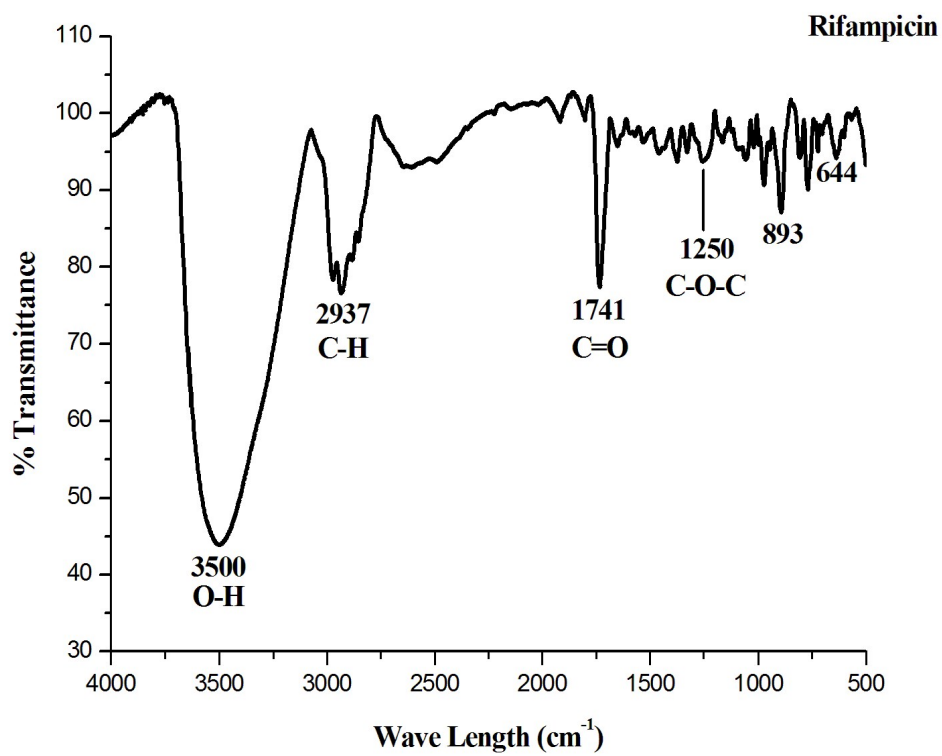

S.Figure.3. FT-IR spectrum of RF

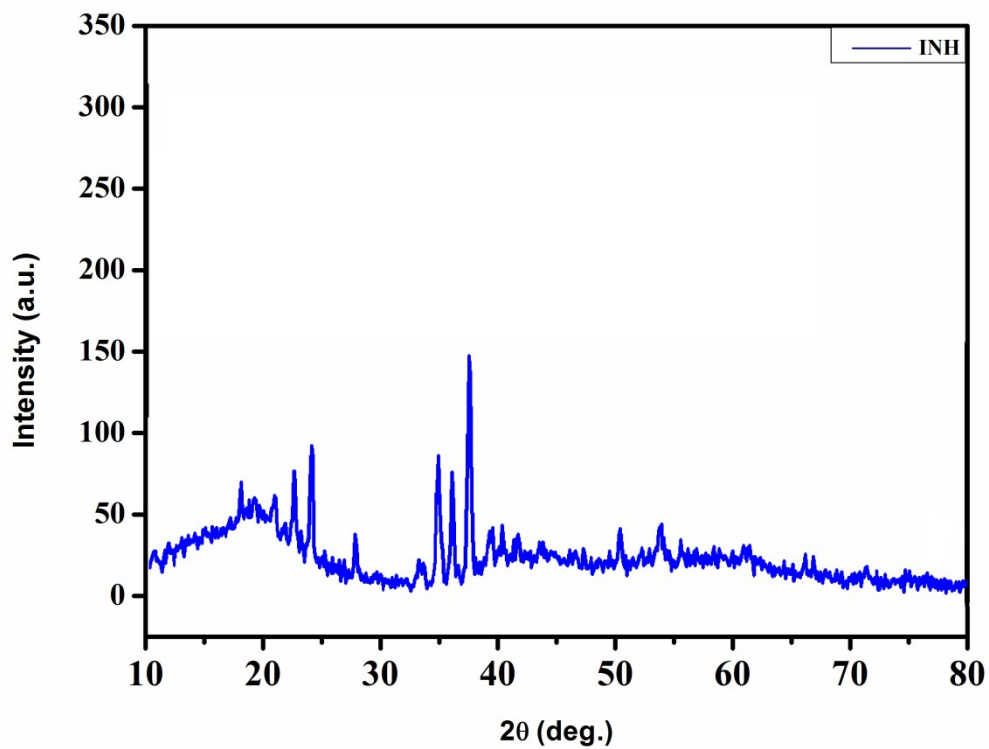

S.Figure.4. XRD pattern of INH

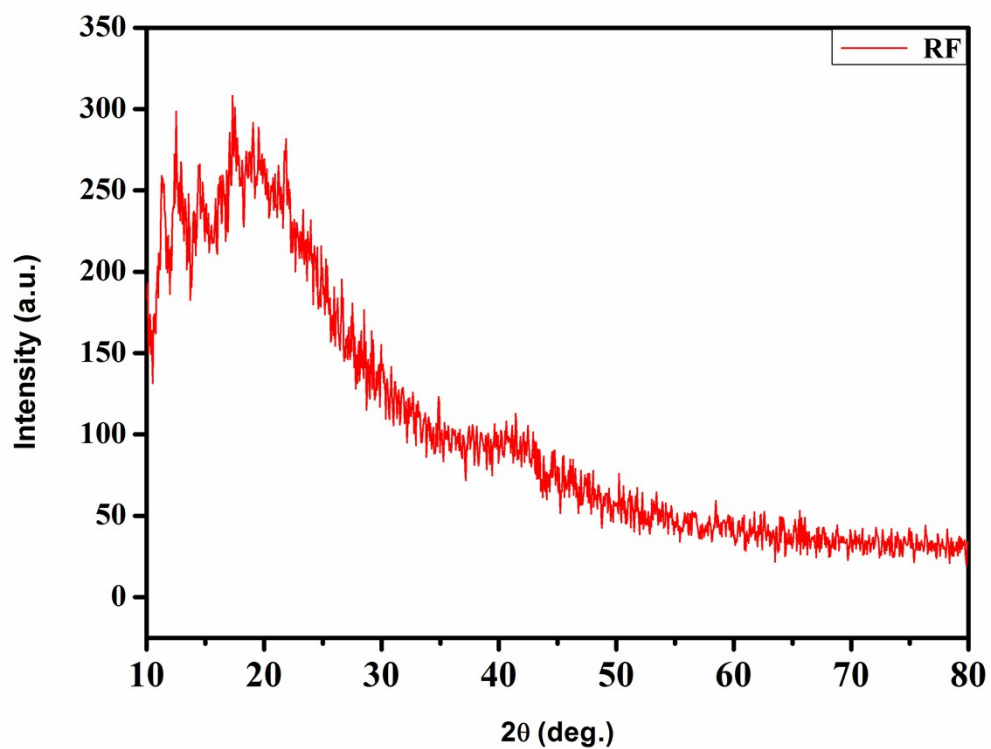

S.Figure.5. XRD pattern of RF

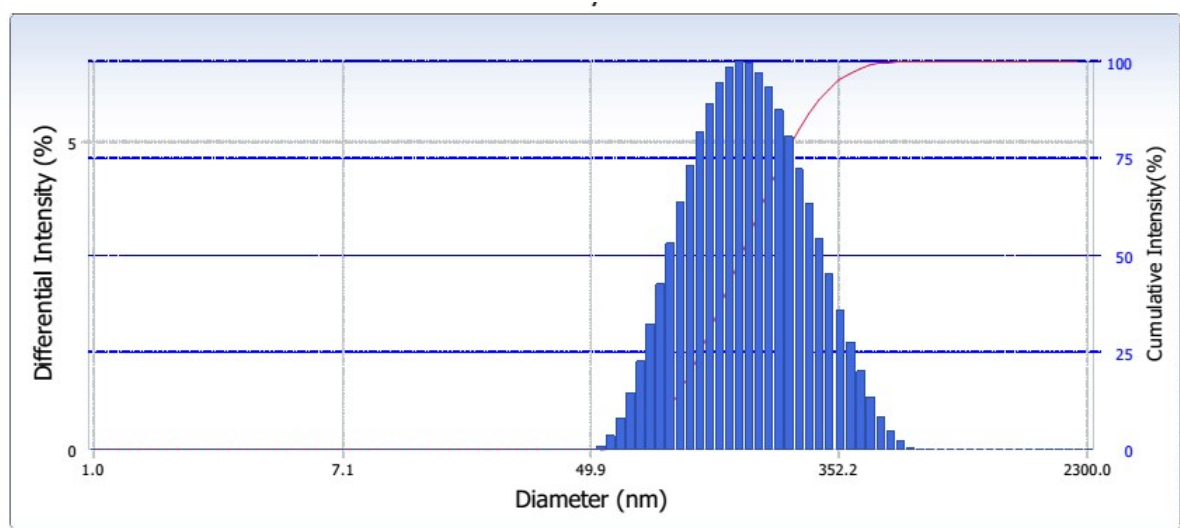

S.Figure.6. Particle size of INH loaded SA-g-AA-RF/CS-g-AA-M

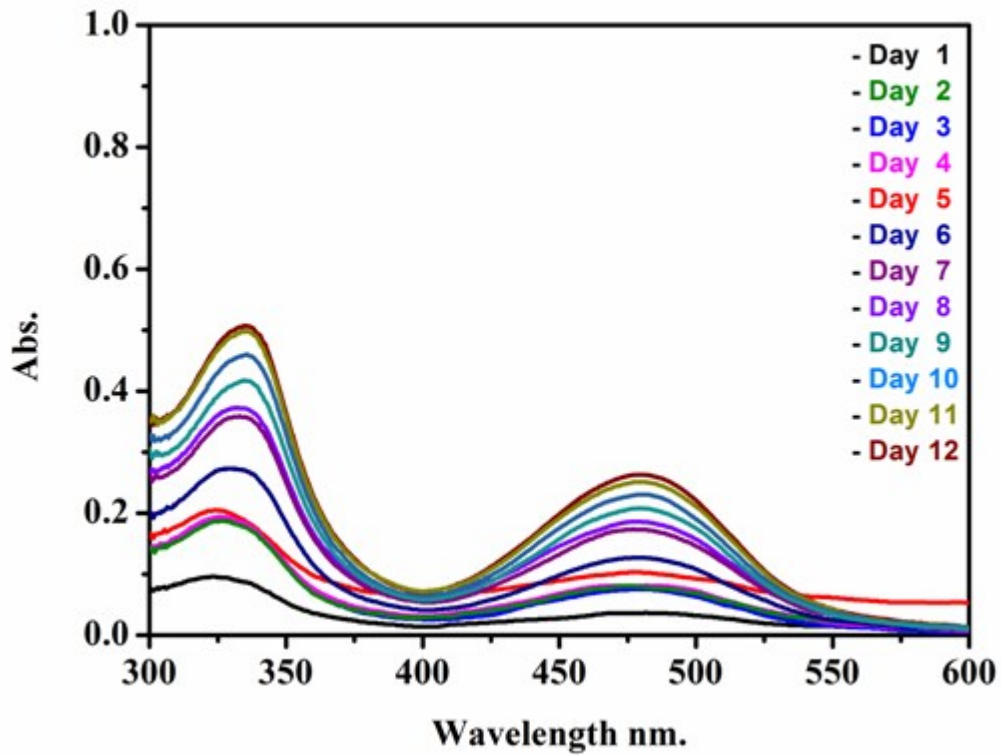

**S.Figure.7.** *In-vitro* drug release behaviour of INH loaded SA-g-AA-RF/CS-g-AA-M at pH 1.2.

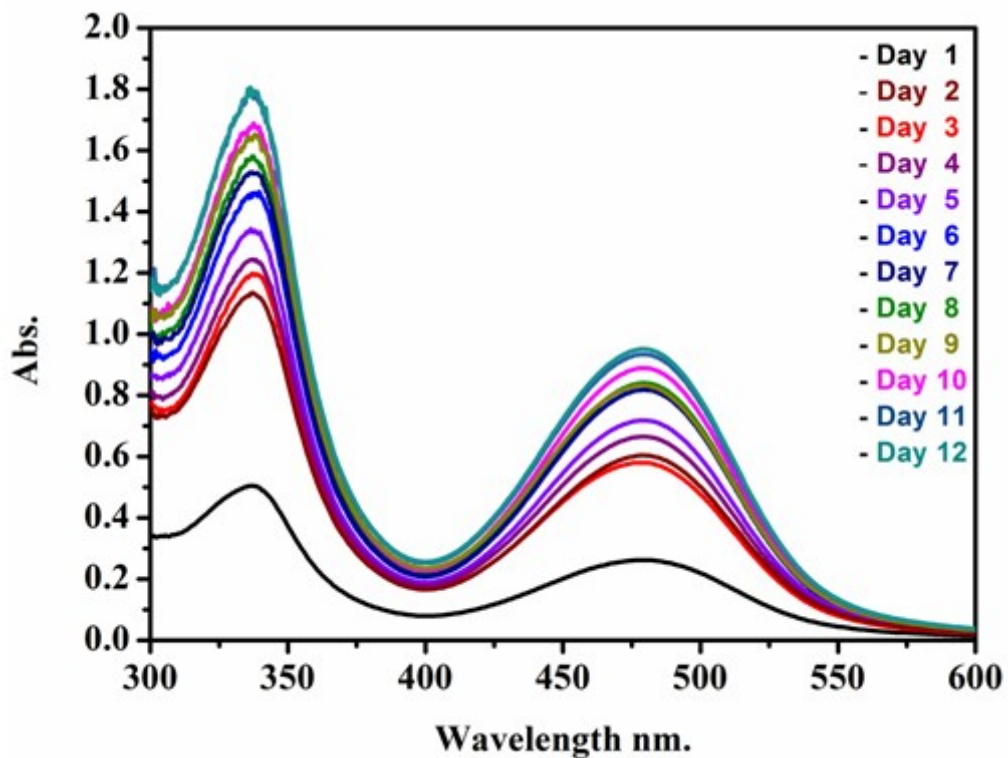

**S.Figure.8.** *In-vitro* drug release behaviour of INH loaded SA-g-AA-RF/CS-g-AA-M at pH 5.5.

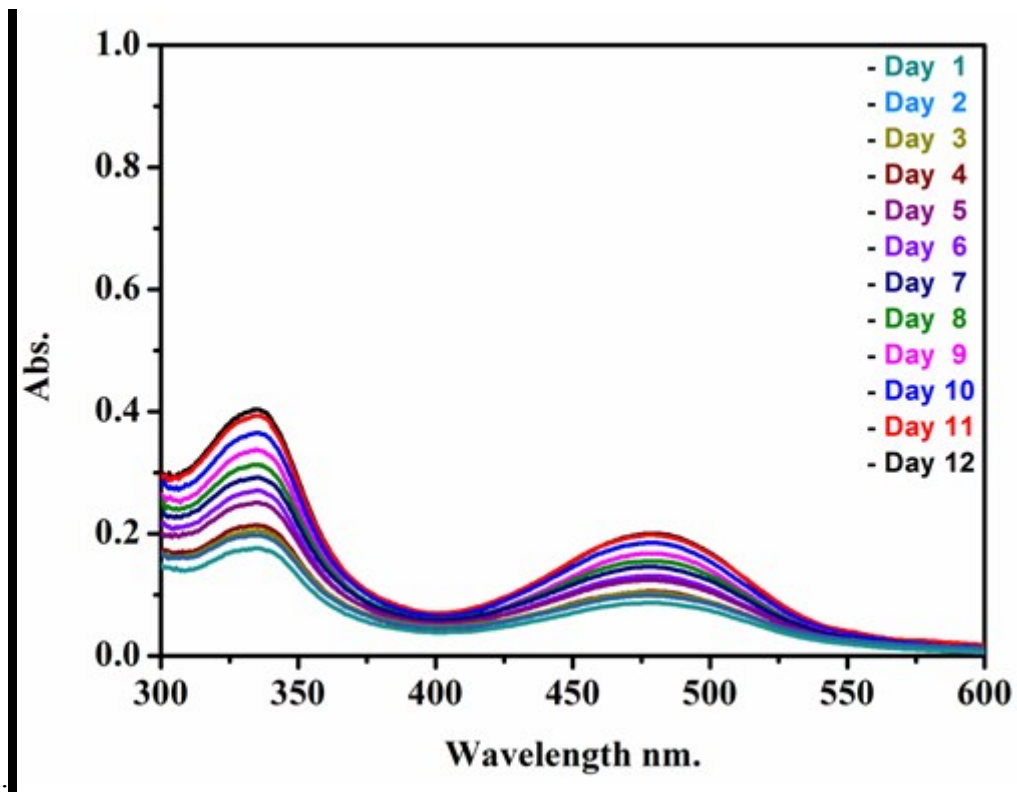

S.Figure.9. *In-vitro* drug release behaviour of INH loaded SA-g-AA-RF/CS-g-AA-M at pH 7.4.

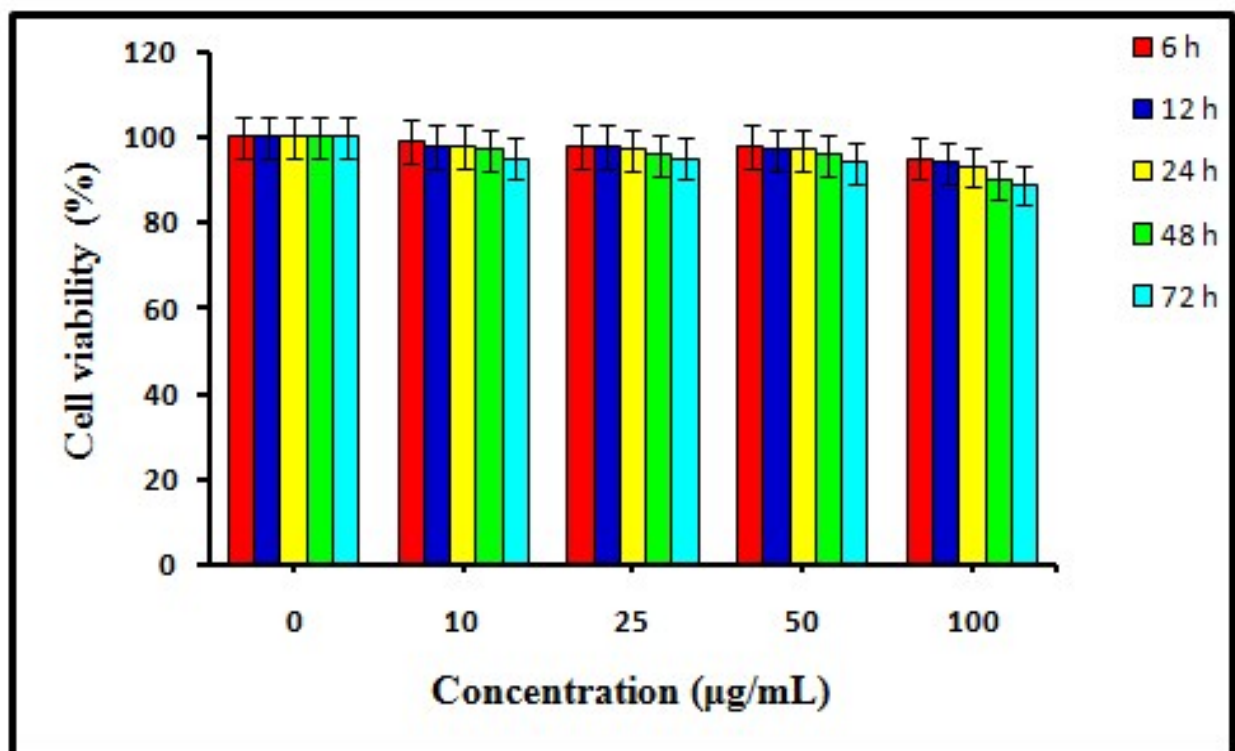

S.Figure.10. Cell viability assay of CS-g-AA-M

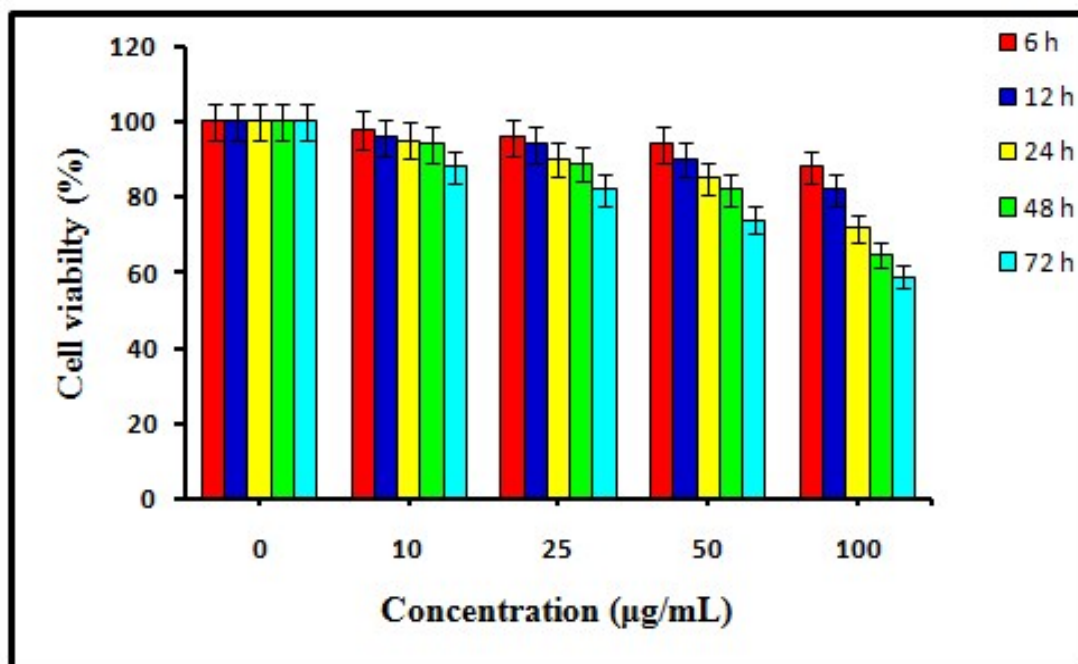

**S.Figure.11.** Cell viability assay of SA-g-AA-RF

**S.Table.1.** Concentration of INH loaded SA-g-AA-RF/CS-g-AA-M nano particles

|   | RF + INH | INH loaded SA-g-AA-RF/CS-g-AA-M nano particles |
|---|----------|------------------------------------------------|
| 1 | 0        | 0                                              |
| 2 | 10       | 0.063 mg                                       |
| 3 | 25       | 0.157 mg                                       |
| 4 | 50       | 0.314 mg                                       |
| 5 | 100      | 0.628 mg                                       |
